# Supplementary material for: Identification and validation of a novel panel of Plasmodium knowlesi biomarkers of serological exposure
Source: PubMed Central journal article supplement (PMC6001954; doi:10.1371/journal.pntd.0006457), 2018-06-14
Supplement: pntd.0006457.s001.pdf [file pntd.0006457.s001.pdf]

## ClinicalTrials.gov Search Results 04/27/2018

|   | Title                                                                         | Recruitment | Study Results        | Conditions                                 | Interventions                                                           | Locations                                                                                                                                                            |
|---|-------------------------------------------------------------------------------|-------------|----------------------|--------------------------------------------|-------------------------------------------------------------------------|----------------------------------------------------------------------------------------------------------------------------------------------------------------------|
| 1 | <a href="#">P. Knowlesi Trial of Artesunate-mefloquine Versus Chloroquine</a> | Completed   | No Results Available | •Uncomplicated Plasmodium Knowlesi Malaria | •Drug: Artesunate-mefloquine<br>•Drug: Chloroquine<br>•Drug: Primaquine | •Kota Marudu District Hospital, Kota Marudu, Sabah, Malaysia<br>•Kudat District Hospital, Kudat, Sabah, Malaysia<br>•Pitas District Hospital, Pitas, Sabah, Malaysia |

U.S. National Library of Medicine | U.S. National Institutes of Health | U.S. Department of Health & Human Services
