# Supplementary material for: Identification and validation of a novel panel of Plasmodium knowlesi biomarkers of serological exposure
Source: PLoS Negl Trop Dis. 2018 Jun 14;12(6):e0006457. doi: 10.1371/journal.pntd.0006457 (PMC6001954; doi:10.1371/journal.pntd.0006457)
Supplement: S6 Table — (XLSX) [file pntd.0006457.s011.xlsx]

## Sheet: Sheet1
Gene	Chromosme	Genome Position	Reference Allele	Gene Position	Number Samples	Cluster 1	Cluster 2	Cluster 3	Type
PKH_041230	ordered_PKNH_04_v2	594240	A	2957	12	cluster1:2/8	cluster2:2/5	cluster3:8/32	missense_variant
PKH_041230	ordered_PKNH_04_v2	594259	G	2976	2	cluster1:0/8	cluster2:0/5	cluster3:2/32	synonymous_variant
PKH_041230	ordered_PKNH_04_v2	594277	C	2994	3	cluster1:0/8	cluster2:0/5	cluster3:3/32	synonymous_variant
