# Supplementary material for: Identification and validation of a novel panel of Plasmodium knowlesi biomarkers of serological exposure
Source: PLoS Negl Trop Dis. 2018 Jun 14;12(6):e0006457. doi: 10.1371/journal.pntd.0006457 (PMC6001954; doi:10.1371/journal.pntd.0006457)
Supplement: S7 Table — (XLSX) [file pntd.0006457.s012.xlsx]

## Sheet: Sheet1
Gene	Chromosme	Genome Position	Reference Allele	Gene Position	Number Samples	Cluster 1	Cluster 2	Cluster 3	Type
PKH_121770	ordered_PKNH_12_v2	2907507	G	1141	33	cluster1:0/8	cluster2:2/5	cluster3:31/32	missense_variant
PKH_121770	ordered_PKNH_12_v2	2907513	C	1147	32	cluster1:0/8	cluster2:0/5	cluster3:32/32	missense_variant
PKH_121770	ordered_PKNH_12_v2	2907537	C	1171	30	cluster1:3/8	cluster2:1/5	cluster3:26/32	missense_variant
PKH_121770	ordered_PKNH_12_v2	2907559	A	1193	1	cluster1:1/8	cluster2:0/5	cluster3:0/32	missense_variant
PKH_121770	ordered_PKNH_12_v2	2907673	G	1307	16	cluster1:0/8	cluster2:0/5	cluster3:16/32	missense_variant
PKH_121770	ordered_PKNH_12_v2	2907686	C	1320	1	cluster1:0/8	cluster2:0/5	cluster3:1/32	missense_variant
PKH_121770	ordered_PKNH_12_v2	2907687	G	1321	1	cluster1:0/8	cluster2:0/5	cluster3:1/32	missense_variant
PKH_121770	ordered_PKNH_12_v2	2907697	C	1331	40	cluster1:8/8	cluster2:0/5	cluster3:32/32	missense_variant
PKH_121770	ordered_PKNH_12_v2	2907698	G	1332	4	cluster1:0/8	cluster2:0/5	cluster3:4/32	synonymous_variant
PKH_121770	ordered_PKNH_12_v2	2907704	C	1338	40	cluster1:8/8	cluster2:0/5	cluster3:32/32	missense_variant
PKH_121770	ordered_PKNH_12_v2	2907726	A	1360	1	cluster1:0/8	cluster2:0/5	cluster3:1/32	missense_variant
PKH_121770	ordered_PKNH_12_v2	2907730	A	1364	1	cluster1:0/8	cluster2:0/5	cluster3:1/32	missense_variant
PKH_121770	ordered_PKNH_12_v2	2907815	C	1449	2	cluster1:0/8	cluster2:0/5	cluster3:2/32	synonymous_variant
PKH_121770	ordered_PKNH_12_v2	2907817	A	1451	30	cluster1:8/8	cluster2:0/5	cluster3:22/32	missense_variant
PKH_121770	ordered_PKNH_12_v2	2907824	T	1458	30	cluster1:8/8	cluster2:0/5	cluster3:22/32	synonymous_variant
PKH_121770	ordered_PKNH_12_v2	2907848	T	1482	1	cluster1:0/8	cluster2:1/5	cluster3:0/32	synonymous_variant
PKH_121770	ordered_PKNH_12_v2	2907854	C	1488	1	cluster1:0/8	cluster2:1/5	cluster3:0/32	synonymous_variant
